# Supplementary material for: Cooperation between CD4+ T Cells and Humoral Immunity Is Critical for Protection against Dengue Using a DNA Vaccine Based on the NS1 Antigen
Source: PLoS Negl Trop Dis. 2015 Dec 9;9(12):e0004277. doi: 10.1371/journal.pntd.0004277 (PMC4674122; doi:10.1371/journal.pntd.0004277)
Supplement: S2 Table — (XLSX) [file pntd.0004277.s003.xlsx]

## Sheet: Plan1
Table S2. Percentage of CD4+ and CD8+ cells in depleted Balb/c mice.
	Non-depleted (%)	CD4 depletion (%)	CD8 depletion (%)
CD4+	44.3	0.02 (99.9)*	30.1
CD8+	13.2	25	0.02 (99.8)*
* values between parenthesis correspond to percentages of depletion
