# Supplementary material for: Cooperation between CD4+ T Cells and Humoral Immunity Is Critical for Protection against Dengue Using a DNA Vaccine Based on the NS1 Antigen
Source: PLoS Negl Trop Dis. 2015 Dec 9;9(12):e0004277. doi: 10.1371/journal.pntd.0004277 (PMC4674122; doi:10.1371/journal.pntd.0004277)
Supplement: S3 Table — (XLSX) [file pntd.0004277.s004.xlsx]

## Sheet: Plan1
Table S3. Percentage of CD4+ and TCD8+ T cells in enriched populations from Balb/c mice.
	Splenocytes (%)	CD4+ enriched population (%)	CD8+ enriched population (%)
CD4+	34.4	58.5	0.06 (99.8)*
CD8+	13.3	2.04 (84.6)*	31.5
B220+	41.4	4.1 (90.1)*	4.1 (90.1)*
* values between parenthesis correspond to the percentage of non-target cell depletion in the enriched population
